# Supplementary material for: Hammerstein–Wiener Motion Artifact Correction for Functional Near-Infrared Spectroscopy: A Novel Inertial Measurement Unit-Based Technique
Source: MDPI journal article supplement (doi:10.3390/s24103173), 2024-05-16
Supplement: s1 [file s1]

## Supplementary Materials

### Arduino codes:

```
#include<Wire.h>

const int MPU2=0x69,MPU1=0x68;

int16_t AcX1,AcY1,AcZ1,Tmp1,GyX1,GyY1,GyZ1;

int16_t AcX2,AcY2,AcZ2,Tmp2,GyX2,GyY2,GyZ2;

//-----\setup loop\-----

void setup(){

    Wire.begin();

    Wire.beginTransmission(MPU1);

    Wire.write(0x6B);// PWR_MGMT_1 register

    Wire.write(0); // set to zero (wakes up the MPU-6050)

    Wire.endTransmission(true);

    Wire.beginTransmission(MPU2);

    Wire.write(0x6B);// PWR_MGMT_1 register

    Wire.write(0); // set to zero (wakes up the MPU-6050)

    Wire.endTransmission(true);

    Serial.begin(9600);

}

//-----\void loop\-----

--

void loop(){

    //get values for first mpu having address of 0x68

    GetMpuValue1(MPU1);
```

```

Serial.print("");

//get values for second mpu having address of 0x69

GetMpuValue2(MPU2);

Serial.println("");

}

//-----\user defined functions\-----

--

void GetMpuValue1(const int MPU){

    Wire.beginTransmission(MPU);

    Wire.write(0x3B); // starting with register 0x3B (ACCEL_XOUT_H)

    Wire.endTransmission(false);

    Wire.requestFrom(MPU, 14, true); // request a total of 14 registers

    AcX1=Wire.read()<<8| Wire.read(); // 0x3B (ACCEL_XOUT_H) & 0x3C (ACCEL_XOUT_L)

    AcY1=Wire.read()<<8| Wire.read(); // 0x3D (ACCEL_YOUT_H) & 0x3E (ACCEL_YOUT_L)

    AcZ1=Wire.read()<<8| Wire.read(); // 0x3F (ACCEL_ZOUT_H) & 0x40 (ACCEL_ZOUT_L)

    GyX1=Wire.read()<<8| Wire.read(); // 0x43 (GYRO_XOUT_H) & 0x44 (GYRO_XOUT_L)

    GyY1=Wire.read()<<8| Wire.read(); // 0x45 (GYRO_YOUT_H) & 0x46 (GYRO_YOUT_L)

    GyZ1=Wire.read()<<8| Wire.read(); // 0x47 (GYRO_ZOUT_H) & 0x48 (GYRO_ZOUT_L)

}

void GetMpuValue2(const int MPU){

    Wire.beginTransmission(MPU);

    Wire.write(0x3B); // starting with register 0x3B (ACCEL_XOUT_H)

    Wire.endTransmission(false);

    Wire.requestFrom(MPU, 14, true); // request a total of 14 registers

    AcX2=Wire.read()<<8| Wire.read(); // 0x3B (ACCEL_XOUT_H) & 0x3C (ACCEL_XOUT_L)

    AcY2=Wire.read()<<8| Wire.read(); // 0x3D (ACCEL_YOUT_H) & 0x3E (ACCEL_YOUT_L)

    AcZ2=Wire.read()<<8| Wire.read(); // 0x3F (ACCEL_ZOUT_H) & 0x40 (ACCEL_ZOUT_L)

    GyX2=Wire.read()<<8| Wire.read(); // 0x43 (GYRO_XOUT_H) & 0x44 (GYRO_XOUT_L)

    GyY2=Wire.read()<<8| Wire.read(); // 0x45 (GYRO_YOUT_H) & 0x46 (GYRO_YOUT_L)

    GyZ2=Wire.read()<<8| Wire.read(); // 0x47 (GYRO_ZOUT_H) & 0x48 (GYRO_ZOUT_L)

```

```

//MPU-1

Serial.print(" ");Serial.print(AcX1);

Serial.print(" ");Serial.print(" ");Serial.print(AcY1),

Serial.print(" ");Serial.print(" ");Serial.print(AcZ1),

Serial.print(" ");Serial.print(" ");Serial.print(GyX1),

Serial.print(" ");Serial.print(" ");Serial.print(GyY1),

Serial.print(" ");Serial.print(" ");Serial.print(GyZ1),

//MPU-2

Serial.print(" ");Serial.print(" ");Serial.print(AcX2),

Serial.print(" ");Serial.print(" ");Serial.print(AcY2),

Serial.print(" ");Serial.print(" ");Serial.print(AcZ2),

Serial.print(" ");Serial.print(" ");Serial.print(GyX2),

Serial.print(" ");Serial.print(" ");Serial.print(GyY2),

Serial.print(" ");Serial.print(" ");Serial.print(GyZ2),

delay(1);

}

```

## Table S1: MA correction processing durations

The processing durations for 41.5 minutes of data were recorded in 8 channels (8 HbO and 8 HbR) sampled at 10 Hz. The analysis was run with HOMER3 on a PC with a Windows 10 operating system and an intel® core™ i5-7500 @3.4 GHz processor.

**Table S1.** The processing time for each tested technique.

| Methods                     | Processing time (seconds) |
|-----------------------------|---------------------------|
| Uncorrected                 | -                         |
| RLOESS                      | 700 ±6                    |
| WCBSI                       | 65 ±0.2                   |
| Wavelet                     | 62 ±0.2                   |
| HWM (head-IMU or probe-IMU) | 26 ±6.2                   |
| splineSG                    | 21 ±0.3                   |
| PCA                         | 17 ±0.5                   |
| Spline                      | 17 ±0.4                   |
| tPCA                        | 16 ±0.5                   |
| CBSI                        | 16 ±0.5                   |

## Table S2: Participants.

**Table S2.** The participant's age, gender, and hair colour

| participant | Age | gender | Hair colour     |
|-------------|-----|--------|-----------------|
| sub-01      | 34  | Male   | dark brown      |
| sub-02      | 34  | Female | black           |
| sub-03      | 26  | Female | medium brown    |
| sub-04      | 33  | Female | black           |
| sub-05      | 29  | Female | light brown     |
| sub-06      | 26  | Female | brown           |
| sub-07      | 29  | Male   | very dark brown |
| sub-08      | 34  | Male   | black           |
| sub-09      | 29  | Female | brown           |
| sub-10      | 26  | Female | black           |
| sub-11      | 32  | Female | black           |
| sub-12      | 34  | Male   | brown           |
| sub-13      | 29  | Female | red             |
| sub-14      | 24  | Male   | light brown     |
| sub-15      | 29  | Female | brown           |
| sub-16      | 24  | Female | dark brown      |
| sub-17      | 24  | Female | black           |
